# Supplementary material for: Deep brain stimulation in the medial septum attenuates temporal lobe epilepsy via entrainment of hippocampal theta rhythm
Source: PubMed Central journal article supplement (PMC8025637; doi:10.1111/cns.13617), 2021-01-27
Supplement: CNS-27-577-s001.pdf [file CNS-27-577-s001.pdf]

## Supplementary information

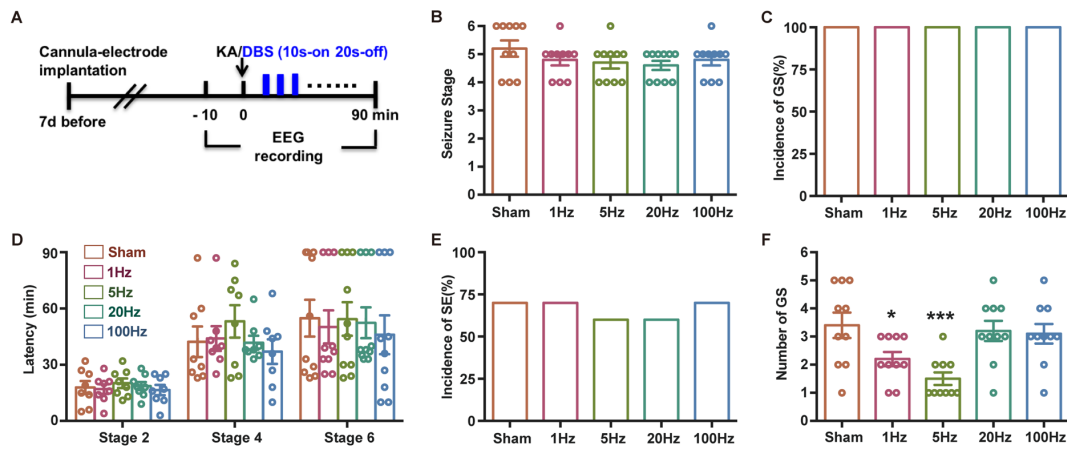

**Figure S1 The effect of intermittent DBS in the MS on KA-induced acute seizure model. (A)**

Schematic diagram of delivery of intermittent DBS (10s “on” state and 20s “off” state) in the MS.

**(B-F)** The effects of intermittent DBS on the latency to the different seizure stage **(B)**, seizure stage

**(C)**, incidence of SE **(D)**, incidence of GS **(E)**, and number of GS **(F)** during 1.5-h observation

period in KA-induced acute seizure model. (n=10 for each group. \*p<0.05, \*\*\*p<0.001 compared

with Sham group, one-way ANOVA followed by post hoc Dunnett test was used for F).

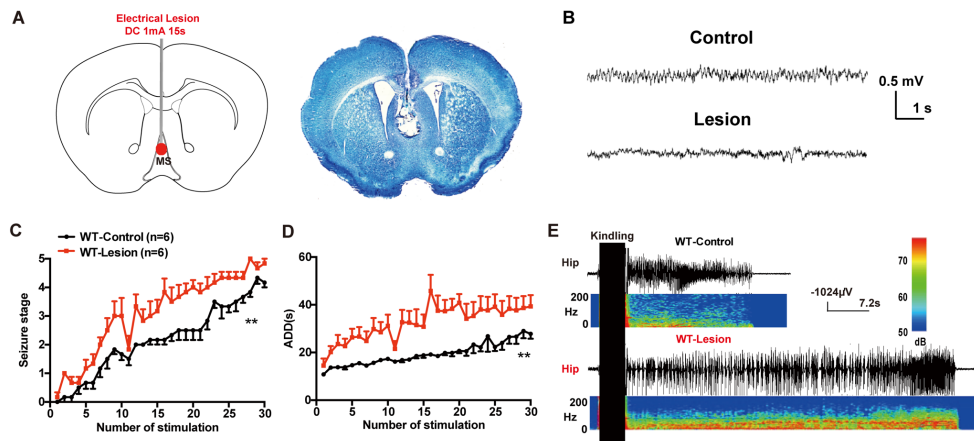

**Figure S2 Electrical lesion of the MS accelerates seizure development in hippocampal kindling model.** (A) Left, schematic diagram of delivery of electrical lesion (by a 1-mA direct current with 15-s duration) in the MS; Right, representative toluidine blue staining in a coronal section of the WT-Lesion mice. (B) The representative EEGs of the MS in a WT-Control mouse and a WT-lesion mouse. (C, D) The effects of electrical lesion of the MS on the development of seizure stage (C) and ADD (D) in hippocampal kindling model; \*\* $p < 0.01$  compared with WT-Control group, two-way ANOVA with repeated measures. (E) Typical EEGs and power spectrogram recorded from the hippocampus during seizures; the black bar indicates kindling stimulation artifact.

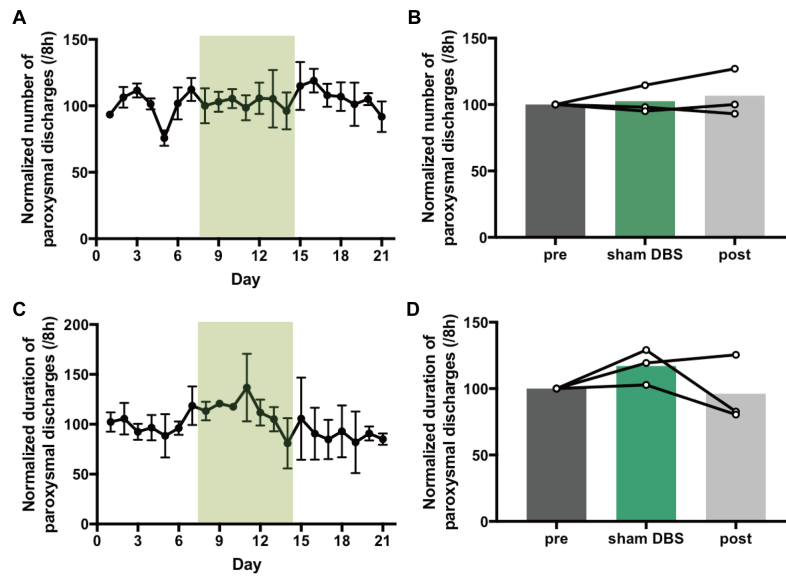

**Figure S3** The effect of sham DBS in the MS on seizure activities in KA-induced chronic epileptic mice. (A-D) The effects of the sham DBS in the MS on the normalized number of paroxysmal discharges (A, B) and the normalized duration of paroxysmal discharges (C, D) in KA-induced chronic epilepsy model. To minimize individual variation, the data for each mouse (n=3) was normalized to the average value of the 7-days pre-sham DBS.
